# Supplementary material for: Effects of elevated temperature on 8-OHdG expression in the American oyster (Crassostrea virginica): Induction of oxidative stress biomarkers, cellular apoptosis, DNA damage and γH2AX signaling pathways
Source: PubMed Central journal article supplement — Fish Shellfish Immunol Rep. 2022 Dec 16;4:100079. doi: 10.1016/j.fsirep.2022.100079 (PMC9798191; doi:10.1016/j.fsirep.2022.100079), 2022-12-16
Supplement: mmc1.pdf [file mmc1.pdf]

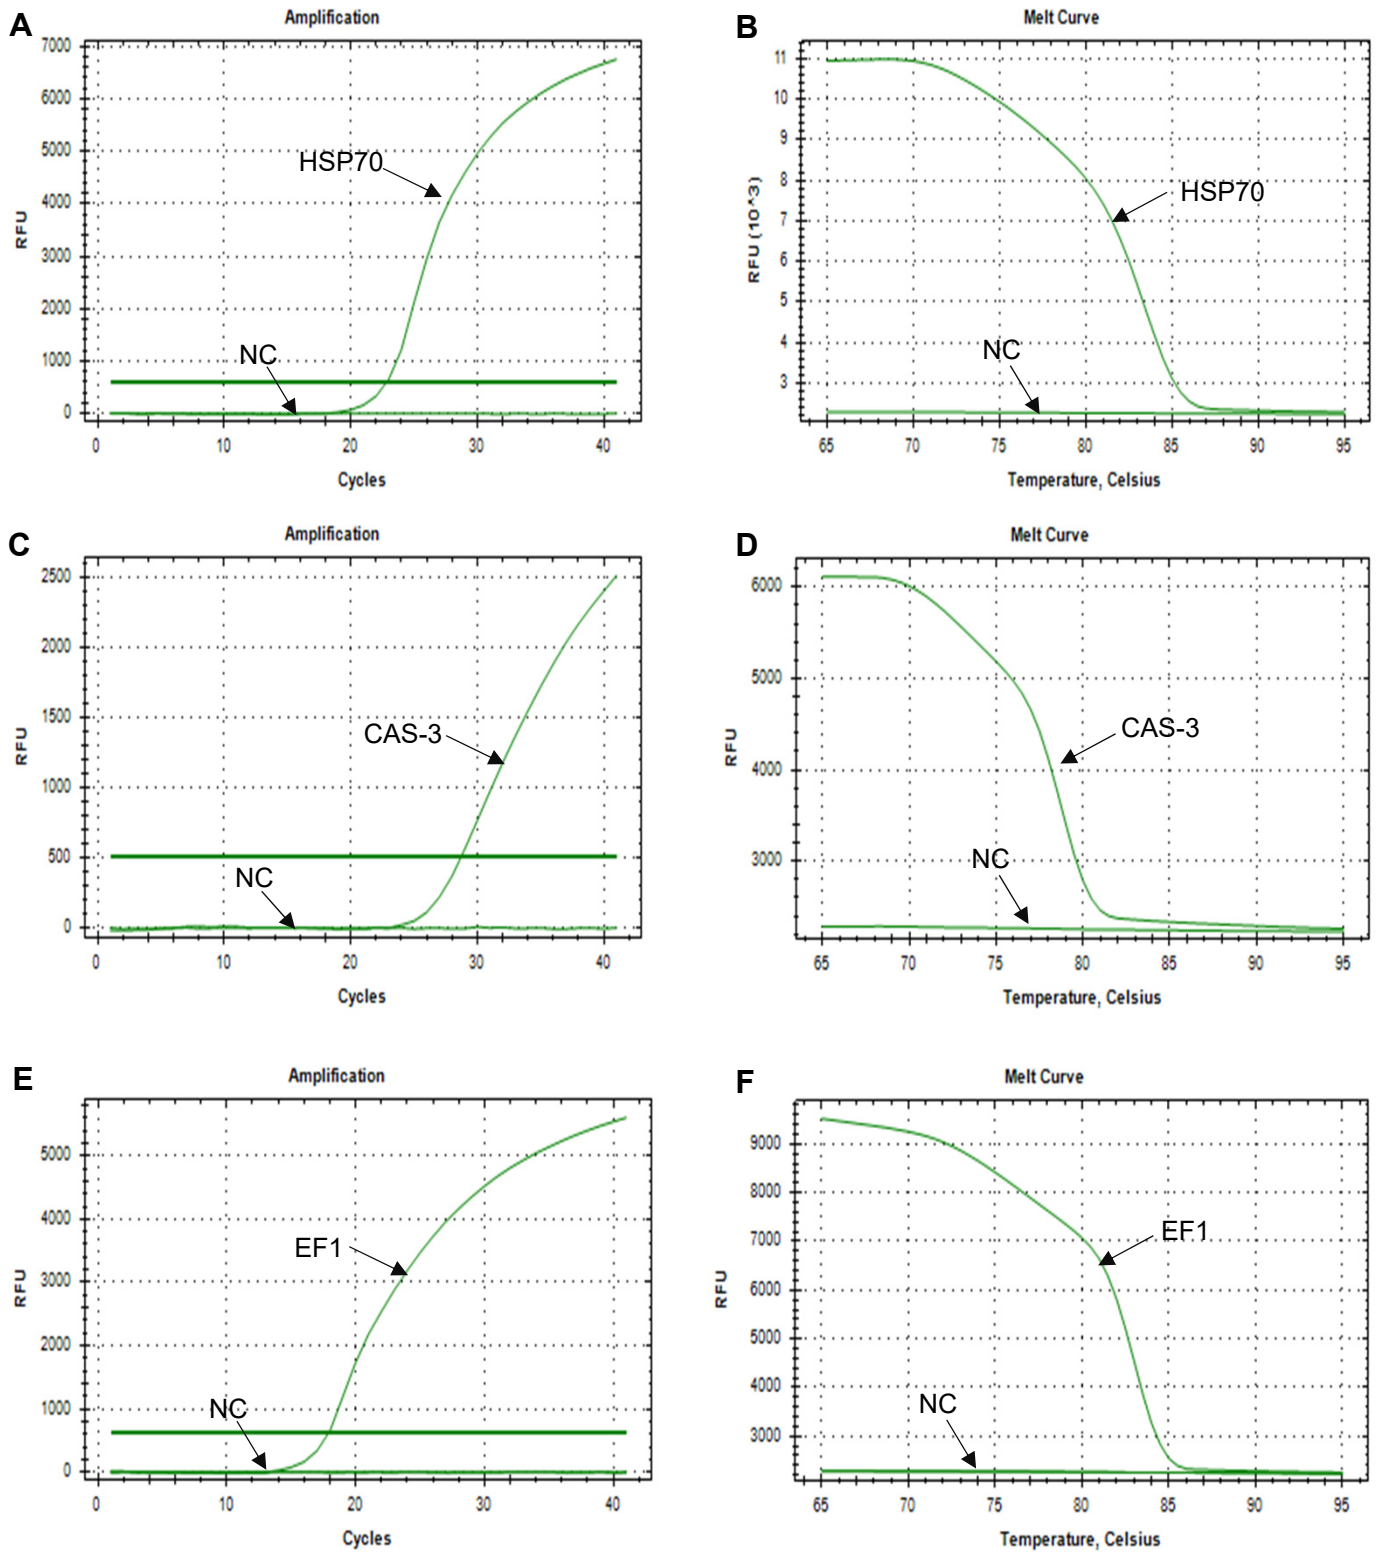

**Supplementary Fig. 1.** Amplification and melting curves from qRT-PCR of heat shock protein-70 (HSP70) (A, B), caspase-3 (CAS-3) (C, D), and elongation factor-1 (EF1) (E, F) genes. NC, negative control.
