# Supplementary material for: Effects of elevated temperature on 8-OHdG expression in the American oyster (Crassostrea virginica): Induction of oxidative stress biomarkers, cellular apoptosis, DNA damage and γH2AX signaling pathways
Source: PubMed Central journal article supplement — Fish Shellfish Immunol Rep. 2022 Dec 16;4:100079. doi: 10.1016/j.fsirep.2022.100079 (PMC9798191; doi:10.1016/j.fsirep.2022.100079), 2022-12-16
Supplement: mmc2.pdf [file mmc2.pdf]

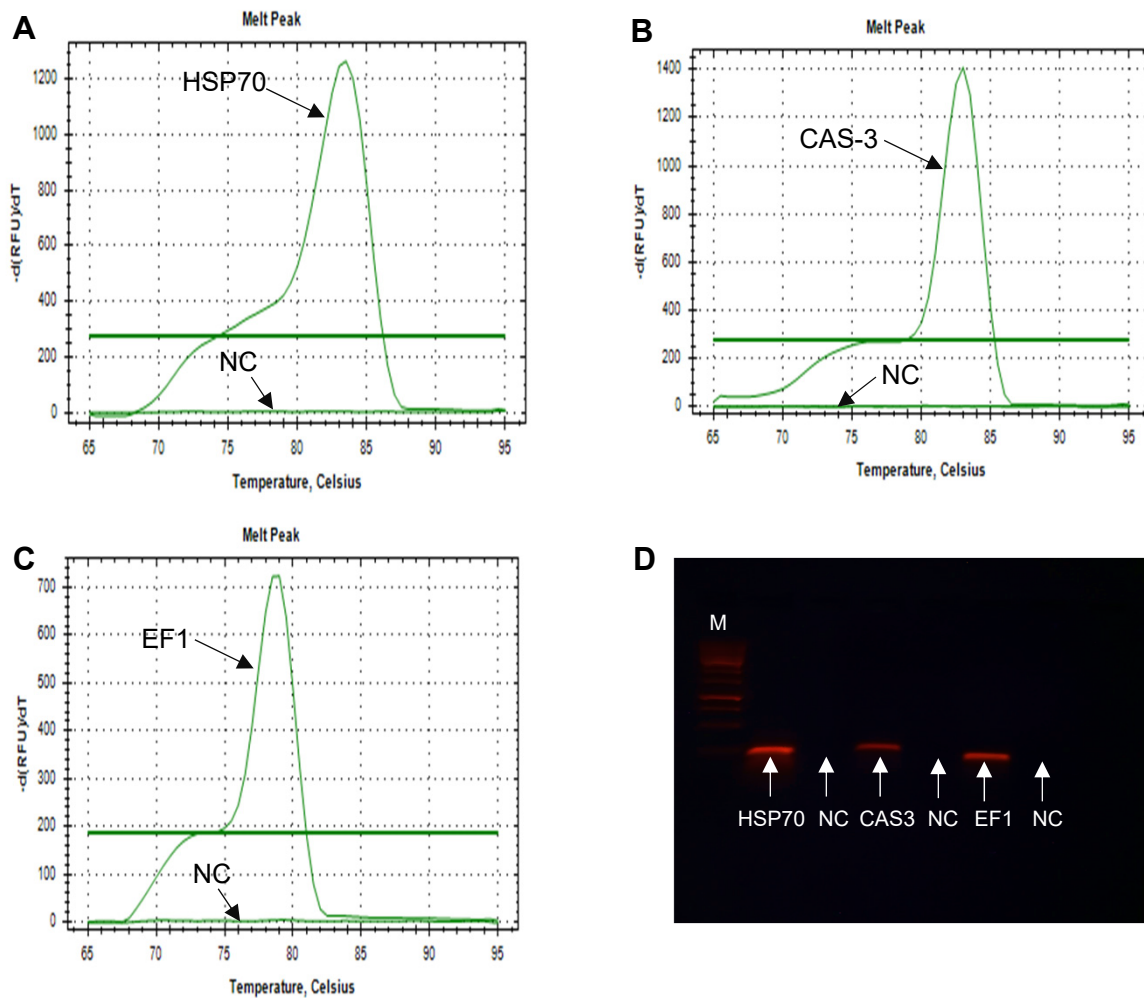

**Supplementary Fig. 2.** Melting curves from qRT-PCR of shock protein-70 (HSP70) (A), caspase-3 (CAS-3) (B), and elongation factor-1 (EF1) (C) genes. (D) Analysis of qRT-PCR amplicons on an agarose gel (1%) stained with ethidium bromide shows a single band of HSP70, CAS-3, and EF1. NC, negative control; M, DNA marker.
